# Supplementary material
Source: publisher figshare collection journal article supplement (https://geolsoc.figshare.com/articles/dataset/_/3453644)
Supplement: Supplementary file 1 [file 1]

## Supplementary data notes for "Observation of centimetre scale argon in alkali feldspars: implications for $^{40}\text{Ar}/^{39}\text{Ar}$ thermochronology" by Flude, Halton, Kelley, Sherlock, Schwanethal and Wilkinson

### Irradiation Parameters and constants for $^{40}\text{Ar}/^{39}\text{Ar}$ data:

New Instruments Noblesse Mass Discrimination: 295 based on linear power law

#### **Irradiation Details:**

Irradiation Number McM53 (Crystal A)

Date irradiated: 21/07/2009

Irradiation Number McM68 (Crystal B)

Date irradiated: 02/09/2011

#### **Atmospheric Argon Ratio**

$^{40}\text{Ar}/^{36}\text{Ar} = 298.56$  (Lee et al 2006)

#### **Interfering isotope production ratios**

$(^{40}\text{Ar}/^{39}\text{Ar})_{\text{K}} = 0.0085 \pm 0.0000425$

Ca corrections were not applied.

#### **Decay Constants**

$^{40}\text{K} \lambda = 5.5545 \times 10^{-10} \text{ a}^{-1}$  (Renne et al, 2010)

$^{39}\text{Ar} = 2.5762 \times 10^{-3} \text{ a}^{-1}$  (Stoenner et al., 1965)

$^{37}\text{Ar} = 0.01983 \text{ d}^{-1}$  (Renne & Norman, 2001 )

#### **Standards and J-Values**

GA1550  $98.8 \pm 0.1 \text{ Ma}$  (Renne et al., 1998, 2010)

J-value calculated by linear extrapolation between standards.

J-Value McM53:  $0.01041 \pm 5.2 \times 10^{-5}$

J-Value McM68  $0.01265 \pm 6.3 \times 10^{-5}$

#### **Data table notes**

**Table\_S1** provides the blank and decay-corrected Ar-isotope and age data for Crystal A, along with system blank data

**Table\_S2** provides the blank and decay-corrected Ar-isotope and age data for Crystal B, along with system blank data

$^{39}\text{Ar}$ -high and  $^{36}\text{Ar}$ -high are the high-mass potential interferences at masses 39 and 36, caused by hydrocarbons. 35 is the peak at mass 35, caused by Cl.

Data in *italics* are analyses that gave  $^{36}\text{Ar}$  yields indistinguishable from or lower than blank, and an atmospheric  $^{40}\text{Ar}$  correction has not been carried out.

Blank corrections were made using part-day averages, depending on blank behaviour during the day.

#### **References**

Lee, J.-Y., Marti, K., Severinghaus, J.P., Kawamura, K., Yoo, H.-S., Lee, J.B., Kim, J.S., 2006. A re-determination of the isotopic abundances of atmospheric Ar. *Geochim. Cosmochim. Acta* 70, 6.

Renne, P. R., Swisher, C. C., Deino, A. L., Karner, D. B., Owens, T. L., DePaolo, D. J., 1998, Intercalibration of standards, absolute ages and uncertainties in  $^{40}\text{Ar}/^{39}\text{Ar}$  dating. *Chemical Geology*. 145: 117-152

Renne, P. R. And Norman, E. B. (2001) Determination of the half-life of  $^{37}\text{Ar}$  by mass spectrometry. *Physical Review C*, 63 DOI: 10.110

Renne, P. R., Mundil, R., Balco, G., Min, K., Ludwig, K. R. (2010a) Joint determination of K-40 decay constants and Ar-40\*/K-40 for the Fish Canyon sanidine standard, and improved accuracy for Ar-40/Ar-39 geochronology *Geochimica et Cosmochimica Acta* 74: 5349-5376 3/PhysRevC.63.047302

Steiger, R. H. and Jäger, E., 1977, Subcommittee on geochronology: convention on the use of decay constants in geo- and cosmochronology. *Earth and Planetary Science Letters* 36: 359-362

Stoenner, R. W., Schaeffer, O. A., Katcoff, S., 1965, Half-lives of Argon-37, Argon-39 and Argon-42. *Science* 148: 1325-1328
