# Supplementary material
Source: publisher figshare collection journal article supplement (https://geolsoc.figshare.com/articles/dataset/_/3453644)

Figure to be read with **Table\_S1**

(which provides the blank and decay-corrected Ar-isotope and age data for Crystal A, along with system blank data)

Table S1 Grain A data and blanks.

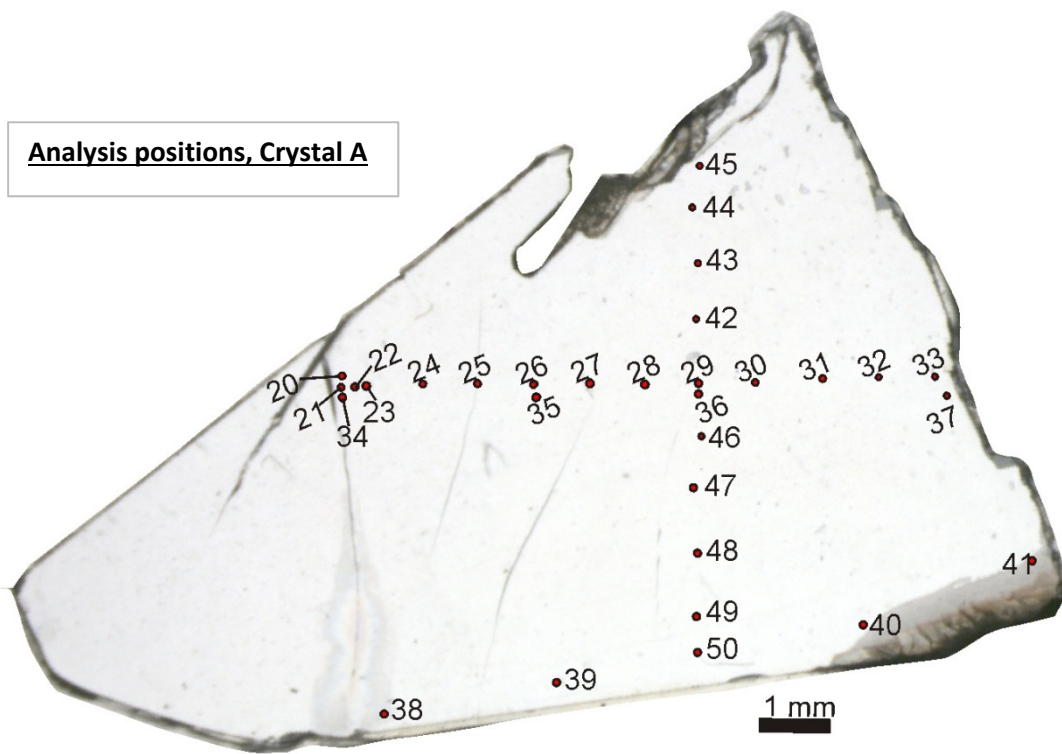

Supplement: Supplementary file 2 [file 1]
